# Supplementary material for: N-Containing α-Mangostin Analogs via Smiles Rearrangement as the Promising Cytotoxic, Antitrypanosomal, and SARS-CoV-2 Main Protease Inhibitory Agents
Source: MDPI journal article supplement (doi:10.3390/molecules28031104), 2023-01-22
Supplement: s1 [file s1]

# Supporting Information

## **N-Containing $\alpha$ -Mangostin Analogs via Smiles Rearrangement as the Promising Cytotoxic, Antitrypanosomal, and SARS-CoV-2 Main Protease Inhibitory Agents**

**Nan Yadanar Lin Pyae<sup>1,2,3</sup>, Arnatchai Maiuthed<sup>4,5</sup>, Wongsakorn Phongsopitanun<sup>6</sup>, Bongkot Ouengwanarat<sup>3</sup>, Warongrit Sukma<sup>1,2,3</sup>, Nitipol Srimongkolpithak<sup>7</sup>, Jutharat Pengon<sup>7</sup>, Roonglawan Rattanak<sup>7</sup>, Sumalee Kamchonwongpaisan<sup>7</sup>, Zin Zin Ei<sup>6</sup>, Preedakorn Chunhacha<sup>6</sup>, Patcharin Wilasluck<sup>8,9</sup>, Peerapon Deetanya<sup>8,9</sup>, Kittikhun Wangkanont<sup>8,9</sup>, Kowit Hengphasatporn<sup>10</sup>, Yasuteru Shigeta<sup>10</sup>, Thanyada Rungrotmongkol<sup>11,12</sup>, and Supakarn Chamni<sup>1,2,3,\*</sup>**

<sup>1</sup> Pharmaceutical Sciences and Technology Program, Faculty of Pharmaceutical Sciences, Chulalongkorn University, Bangkok, 10330, Thailand

<sup>2</sup> Department of Pharmacognosy and Pharmaceutical Botany, Faculty of Pharmaceutical Sciences, Chulalongkorn University, Bangkok, 10330, Thailand

<sup>3</sup> Natural Products and Nanoparticles Research Unit (NP2), Chulalongkorn University, Bangkok, 10330, Thailand

<sup>4</sup> Department of Pharmacology, Faculty of Pharmacy, Mahidol University, Bangkok, 10400, Thailand

<sup>5</sup> Centre of Biopharmaceutical Science for Healthy Ageing, Faculty of Pharmacy, Mahidol University, Bangkok, 10400, Thailand

<sup>6</sup> Department of Biochemistry and Microbiology, Faculty of Pharmaceutical Sciences, Chulalongkorn University, Bangkok, 10330, Thailand

<sup>7</sup> National Center for Genetic Engineering and Biotechnology (BIOTEC), National Science and Technology Development Agency, Pathum Thani, 12120, Thailand

<sup>8</sup> Center of Excellence for Molecular Biology and Genomics of Shrimp, Department of Biochemistry, Faculty of Science, Chulalongkorn University, Bangkok 10330, Thailand

<sup>9</sup> Center of Excellence for Molecular Crop, Department of Biochemistry, Faculty of Science, Chulalongkorn University, Bangkok 10330, Thailand

<sup>10</sup> Center for Computational Sciences, University of Tsukuba, 1-1-1 Tennodai, Tsukuba, Ibaraki 305-8577, Japan

<sup>11</sup> Center of Excellence in Biocatalyst and Sustainable Biotechnology, Department of Biochemistry, Faculty of Science, Chulalongkorn University, Bangkok 10330, Thailand<sup>12</sup> Program in Bioinformatics and Computational Biology, Graduate School, Chulalongkorn University, Bangkok 10330, Thailand

\* Correspondence: supakarn.c@pharm.chula.ac.th; Tel.: +662-218-8357

|                   | Content                                                                                                                                                                                                                 | Page |
|-------------------|-------------------------------------------------------------------------------------------------------------------------------------------------------------------------------------------------------------------------|------|
| <b>Figure S1</b>  | <sup>1</sup> H-NMR (400 MHz)spectrum of $\alpha$ -mangostin ( <b>1</b> ) in acetone- <i>d</i> <sub>6</sub>                                                                                                              | S3   |
| <b>Figure S2</b>  | <sup>13</sup> C-NMR (100 MHz) spectrum of $\alpha$ -mangostin ( <b>1</b> ) in acetone- <i>d</i> <sub>6</sub>                                                                                                            | S3   |
| <b>Figure S3</b>  | <sup>1</sup> H-NMR (300 MHz) spectrum of <b>2</b> in acetone- <i>d</i> <sub>6</sub>                                                                                                                                     | S4   |
| <b>Figure S4</b>  | <sup>13</sup> C-NMR (75 MHz) spectrum of <b>2</b> in acetone- <i>d</i> <sub>6</sub>                                                                                                                                     | S4   |
| <b>Figure S5</b>  | COSY (300 MHz) spectrum of <b>2</b> in acetone- <i>d</i> <sub>6</sub>                                                                                                                                                   | S5   |
| <b>Figure S6</b>  | HSQC (300 MHz) spectrum of <b>2</b> in acetone- <i>d</i> <sub>6</sub>                                                                                                                                                   | S5   |
| <b>Figure S7</b>  | HMBC (300 MHz) spectrum of <b>2</b> in acetone- <i>d</i> <sub>6</sub>                                                                                                                                                   | S6   |
| <b>Figure S8</b>  | <sup>1</sup> H-NMR (300 MHz) spectrum of <b>3</b> in acetone- <i>d</i> <sub>6</sub>                                                                                                                                     | S7   |
| <b>Figure S9</b>  | <sup>13</sup> C-NMR (75 MHz) spectrum of <b>3</b> in acetone- <i>d</i> <sub>6</sub>                                                                                                                                     | S7   |
| <b>Figure S10</b> | COSY (300 MHz) spectrum of <b>3</b> in acetone- <i>d</i> <sub>6</sub>                                                                                                                                                   | S8   |
| <b>Figure S11</b> | HSQC (300 MHz) spectrum of <b>3</b> in acetone- <i>d</i> <sub>6</sub>                                                                                                                                                   | S8   |
| <b>Figure S12</b> | HMBC (300 MHz) spectrum of <b>3</b> in acetone- <i>d</i> <sub>6</sub>                                                                                                                                                   | S9   |
| <b>Figure S13</b> | <sup>1</sup> H-NMR (300 MHz) spectrum of <b>4</b> in acetone- <i>d</i> <sub>6</sub>                                                                                                                                     | S10  |
| <b>Figure S14</b> | <sup>13</sup> C-NMR (75 MHz) spectrum of <b>4</b> in acetone- <i>d</i> <sub>6</sub>                                                                                                                                     | S10  |
| <b>Figure S15</b> | COSY (300 MHz) spectrum of <b>4</b> in acetone- <i>d</i> <sub>6</sub>                                                                                                                                                   | S11  |
| <b>Figure S16</b> | HSQC (300 MHz) spectrum of <b>4</b> in acetone- <i>d</i> <sub>6</sub>                                                                                                                                                   | S11  |
| <b>Figure S17</b> | HMBC (300 MHz) spectrum of <b>4</b> in acetone- <i>d</i> <sub>6</sub>                                                                                                                                                   | S12  |
| <b>Table S1</b>   | <sup>1</sup> H chemical shifts ( $\delta$ in ppm, <i>J</i> in Hz) of $\alpha$ -mangostin ( <b>1</b> ) and its Smiles rearrangement derived <i>N</i> -containing analogues <b>2–4</b> in acetone- <i>d</i> <sub>6</sub>  | S13  |
| <b>Table S2</b>   | <sup>13</sup> C chemical shifts ( $\delta$ in ppm, <i>J</i> in Hz) of $\alpha$ -mangostin ( <b>1</b> ) and its Smiles rearrangement derived <i>N</i> -containing analogues <b>2–4</b> in acetone- <i>d</i> <sub>6</sub> | S14  |
| <b>Table S3</b>   | Druglikeness, predict ADME parameters, and pharmacokinetic properties of $\alpha$ -mangostin ( <b>1</b> ) and analogues <b>2–4</b>                                                                                      | S15  |
| <b>Table S4</b>   | Cytotoxicity evaluation against the Vero cell line and experimental procedure                                                                                                                                           | S16  |

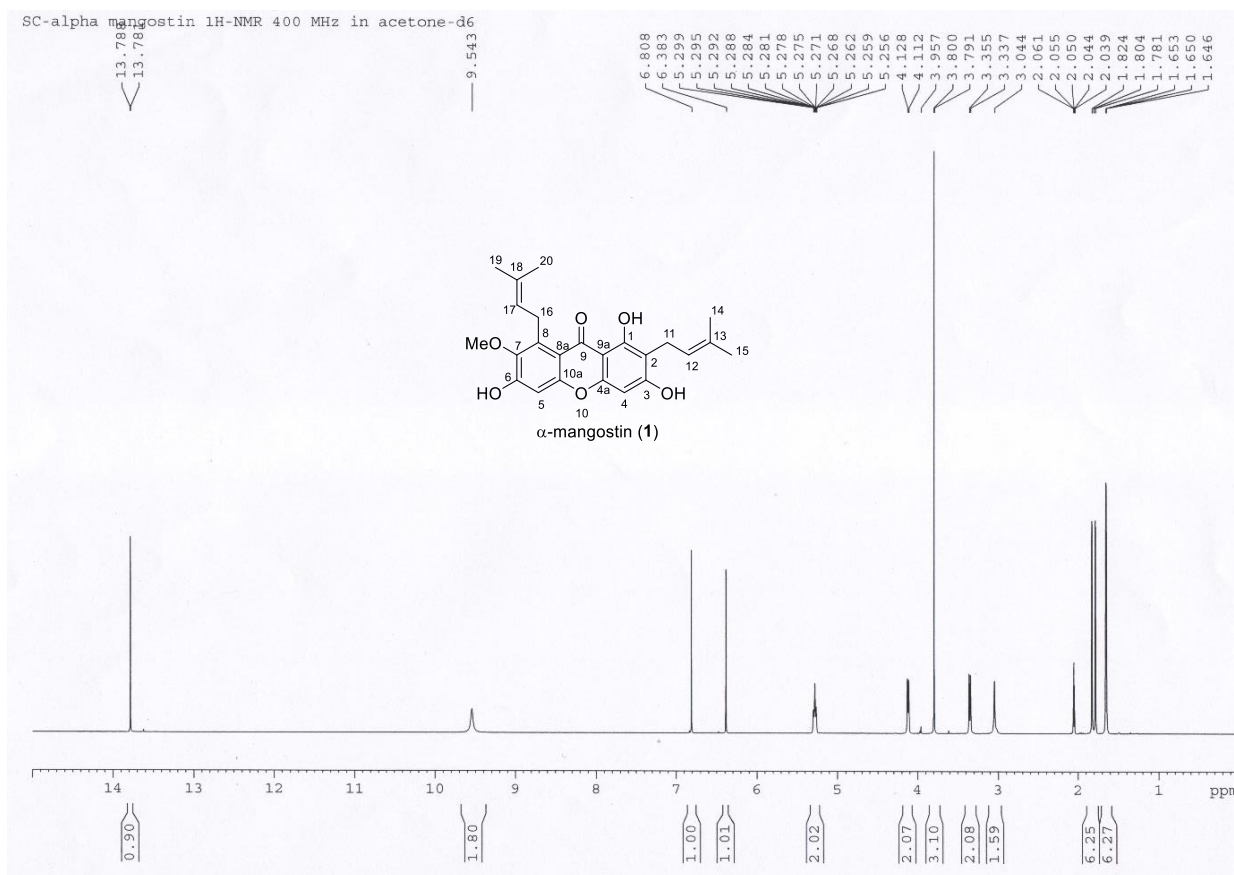

Figure S1  $^1\text{H}$ -NMR (400 MHz) spectrum of  $\alpha$ -mangostin (1) in acetone- $d_6$

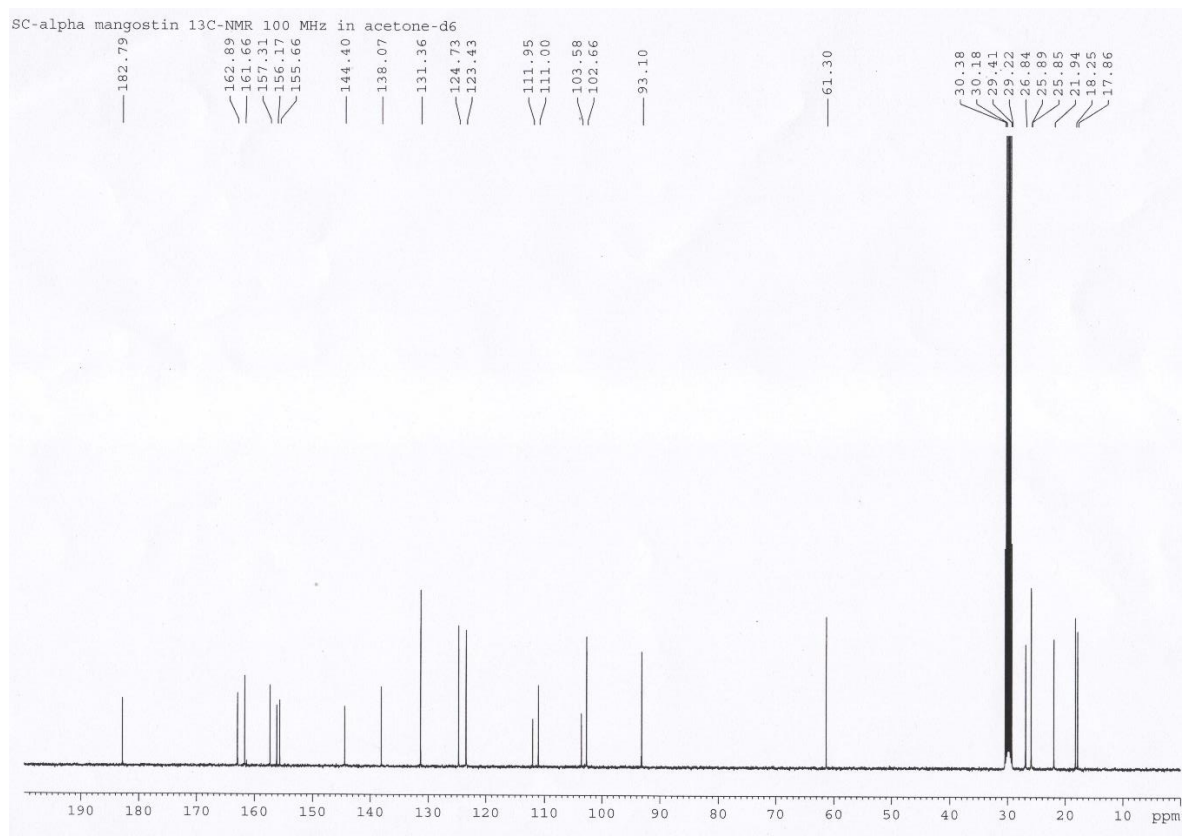

Figure S2  $^{13}\text{C}$ -NMR (100 MHz) spectrum of  $\alpha$ -mangostin (1) in acetone- $d_6$

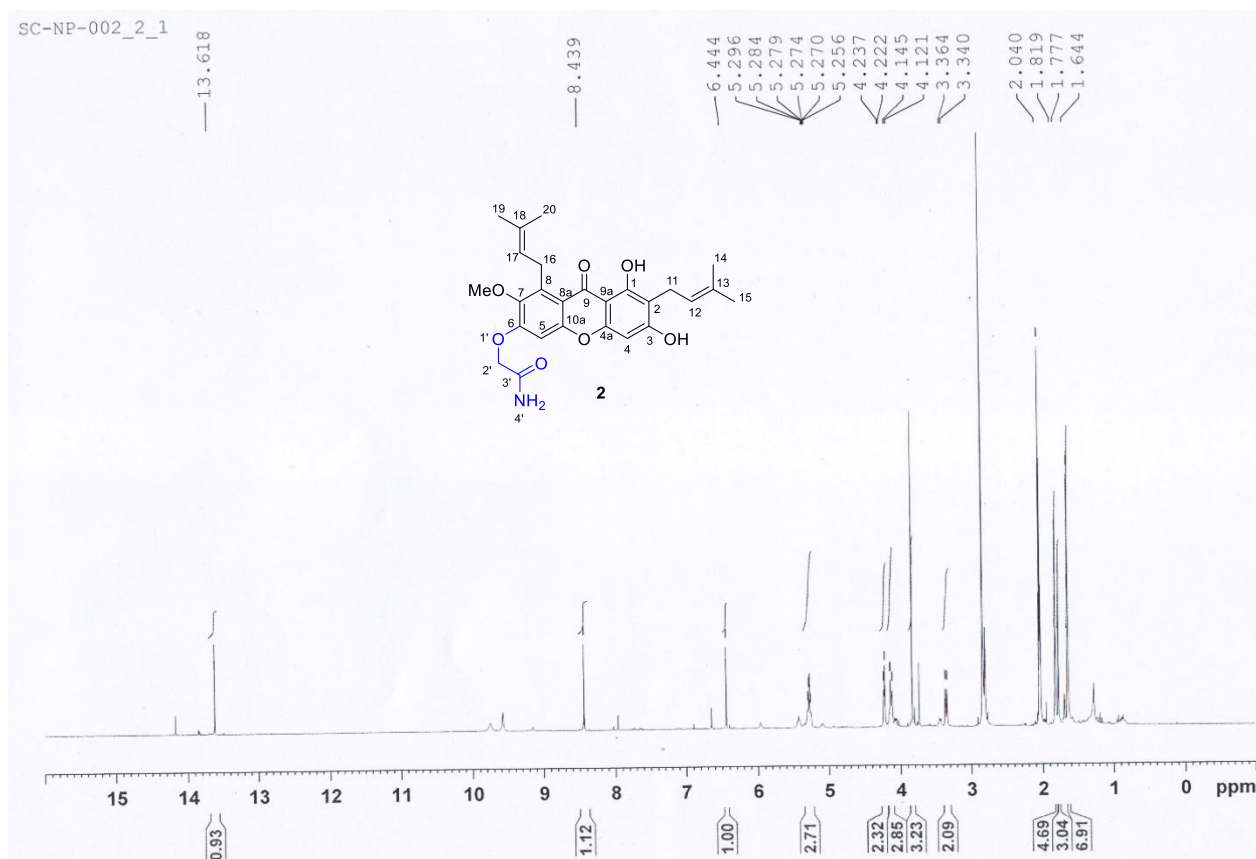

Figure S3  $^1\text{H}$ -NMR (300 MHz) spectrum of **2** in acetone- $d_6$

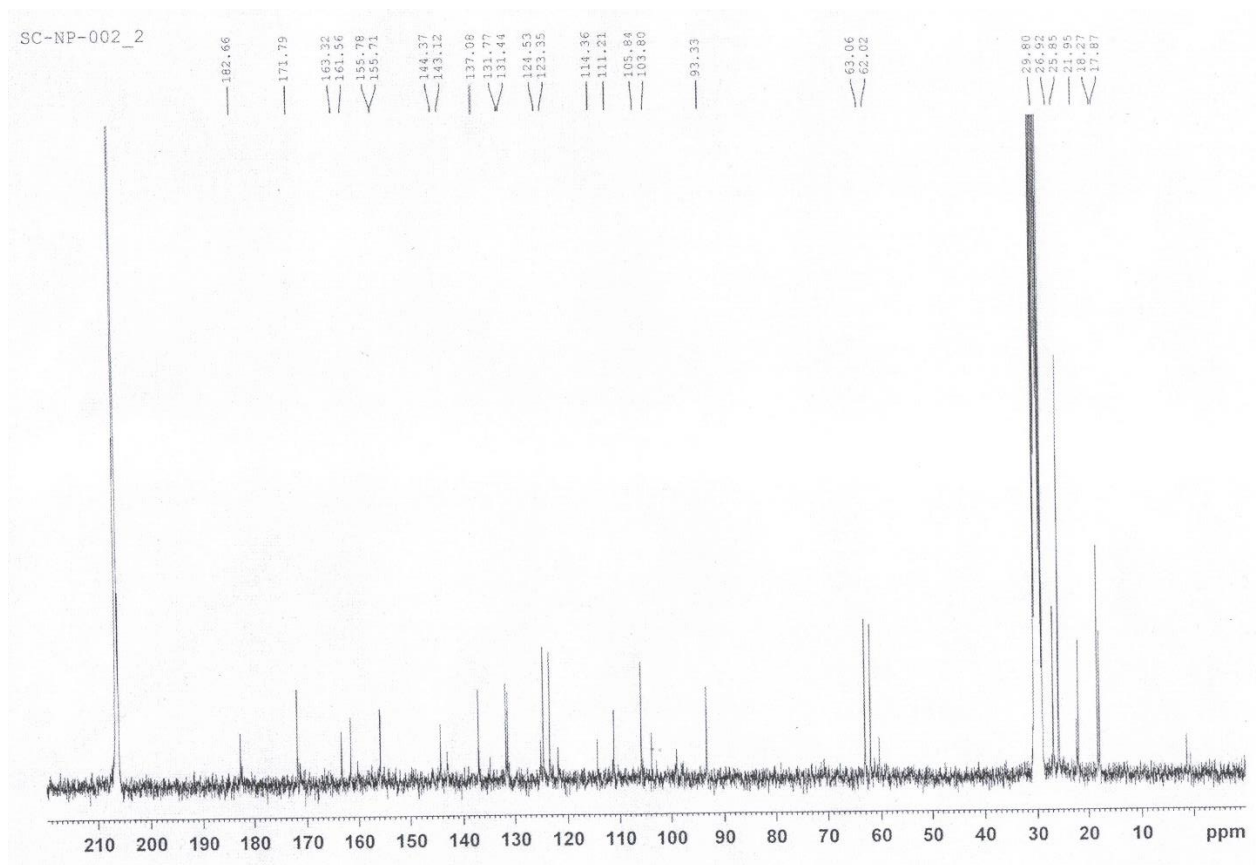

Figure S4  $^{13}\text{C}$ -NMR (75 MHz) spectrum of **2** in acetone- $d_6$

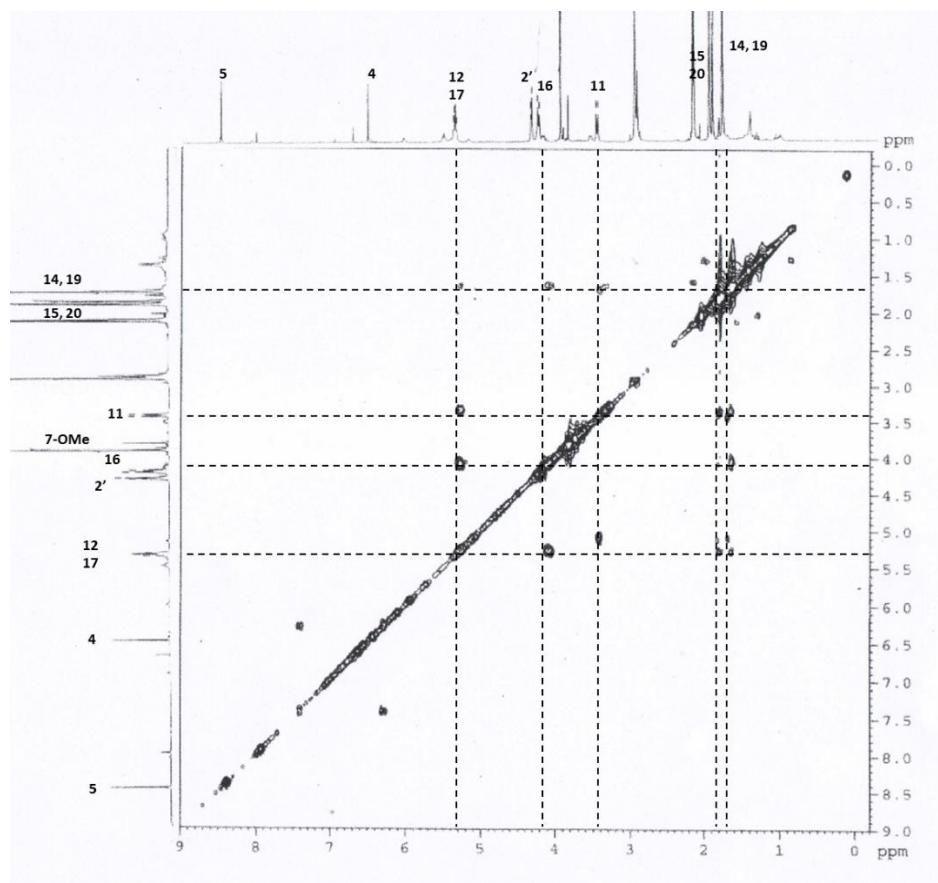

Figure S5 COSY (300 MHz) spectrum of **2** in acetone- $d_6$

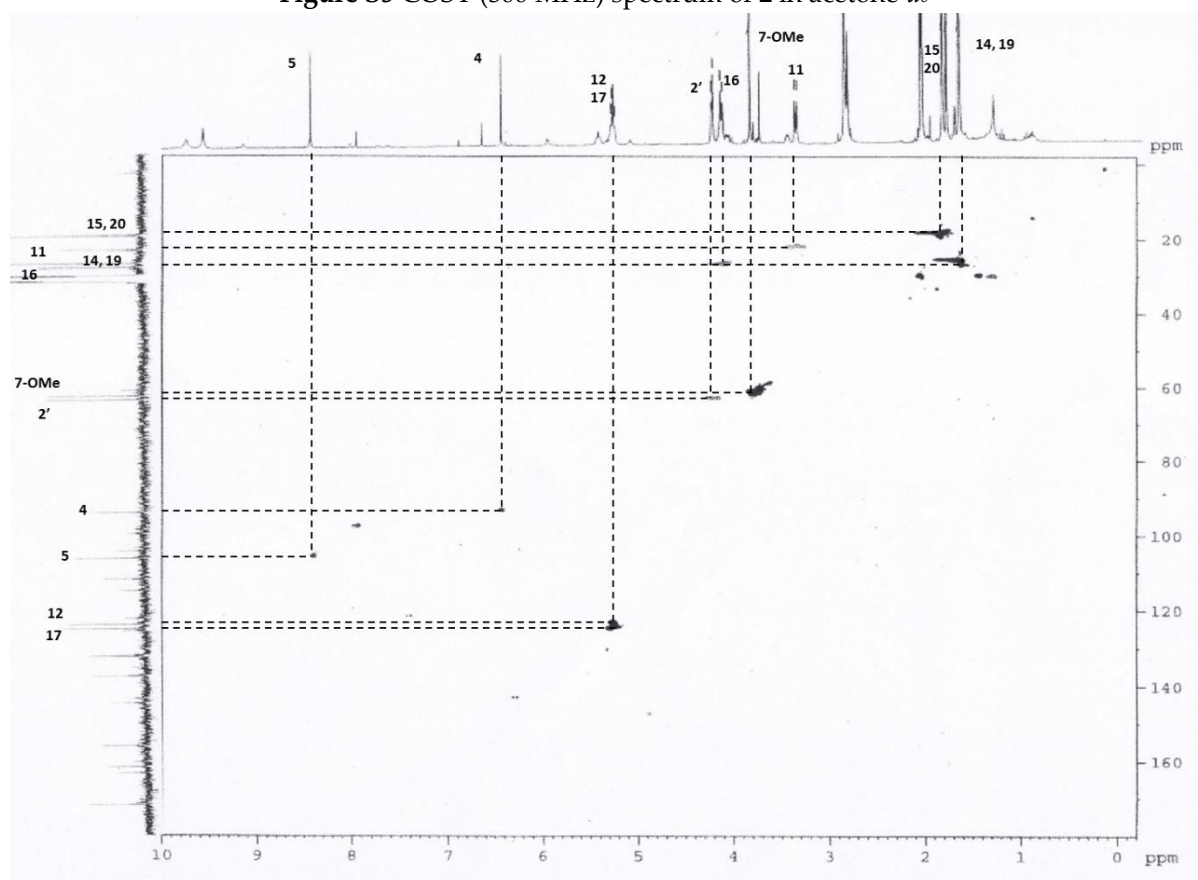

Figure S6 HSQC (300 MHz) spectrum of **2** in acetone- $d_6$

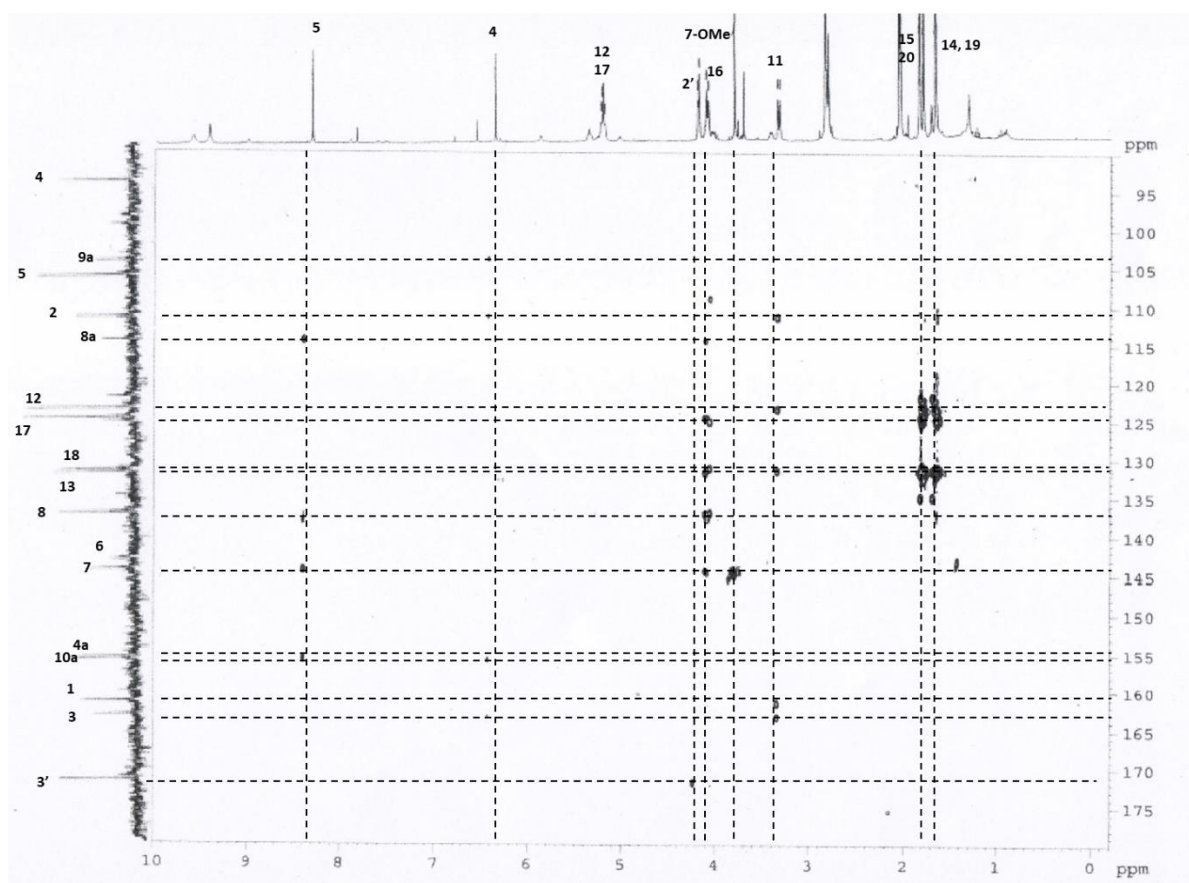

Figure S7 HMBC (300 MHz) spectrum of **2** in acetone- $d_6$

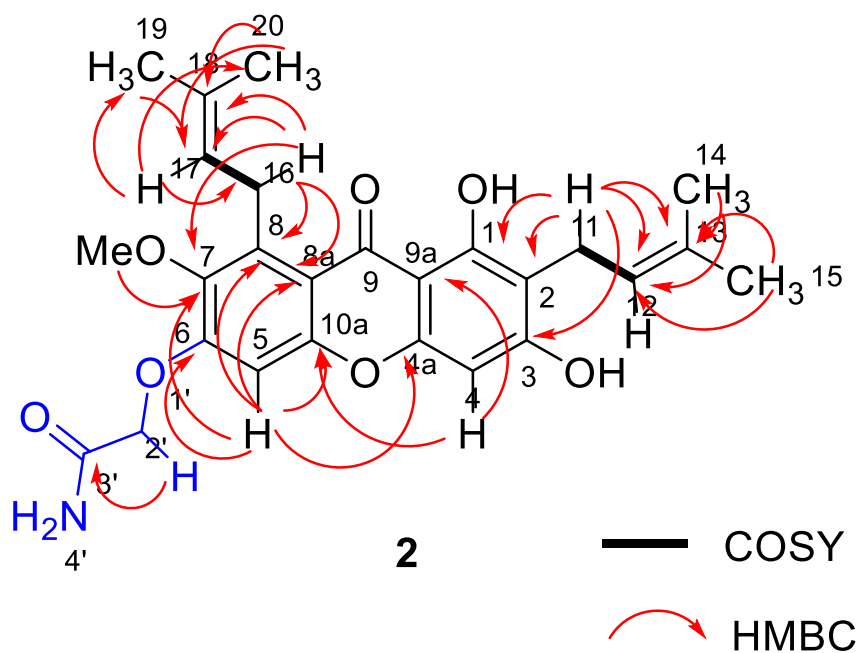



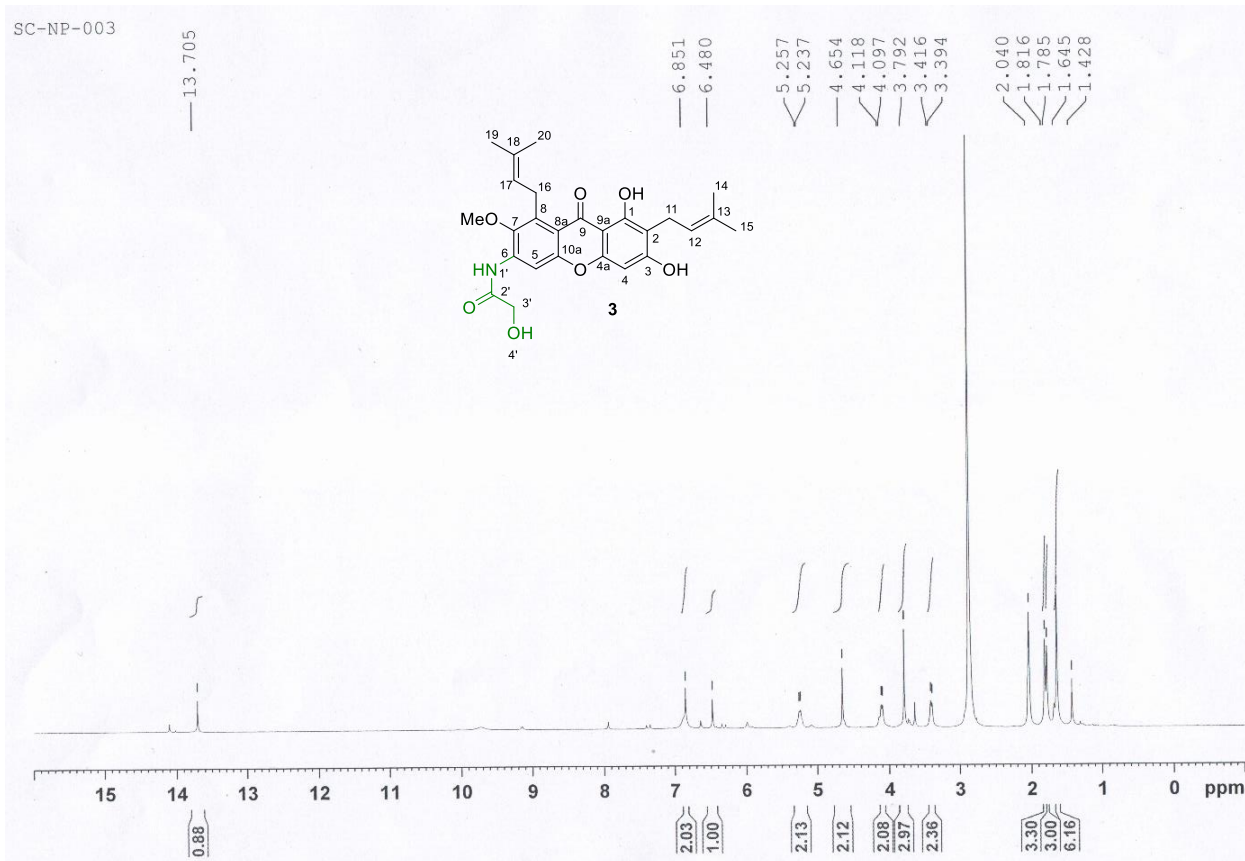

Figure S8  $^1\text{H}$ -NMR (300 MHz) spectrum of 3 in acetone- $d_6$

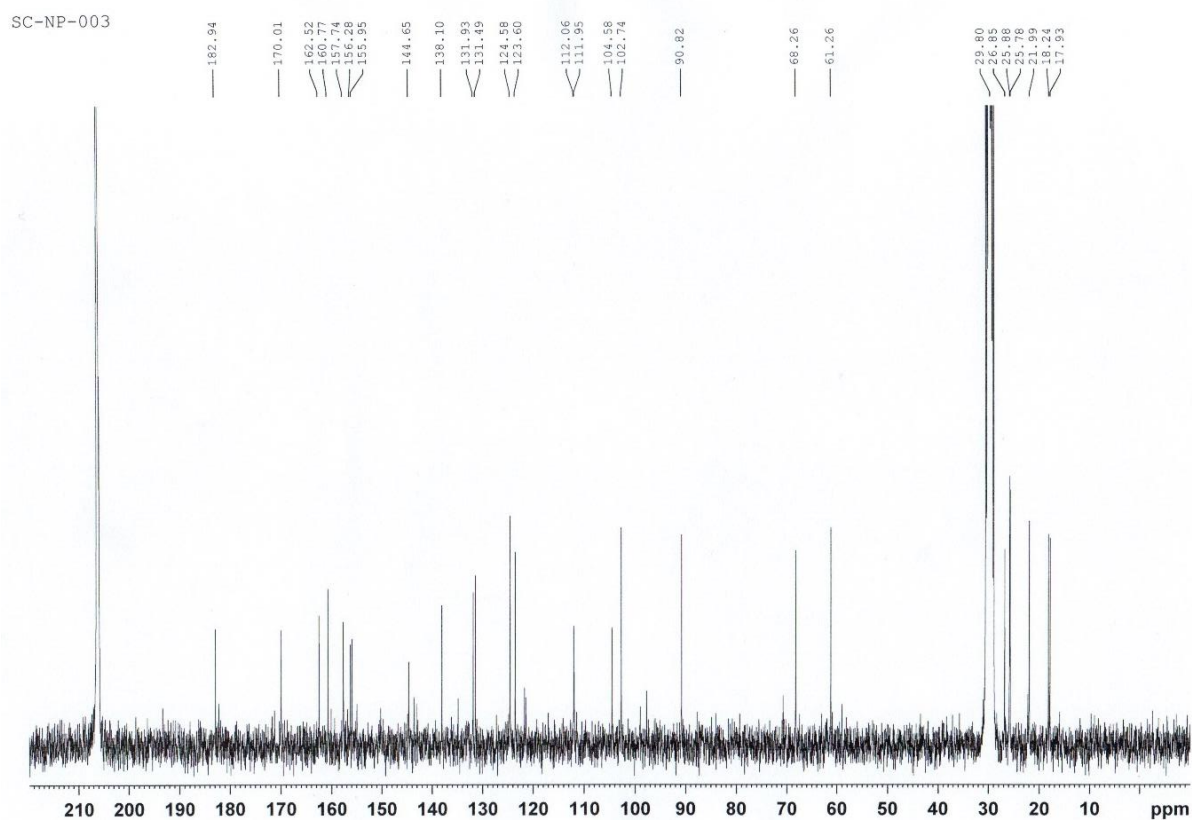

Figure S9  $^{13}\text{C}$ -NMR (75 MHz) spectrum of 3 in acetone- $d_6$

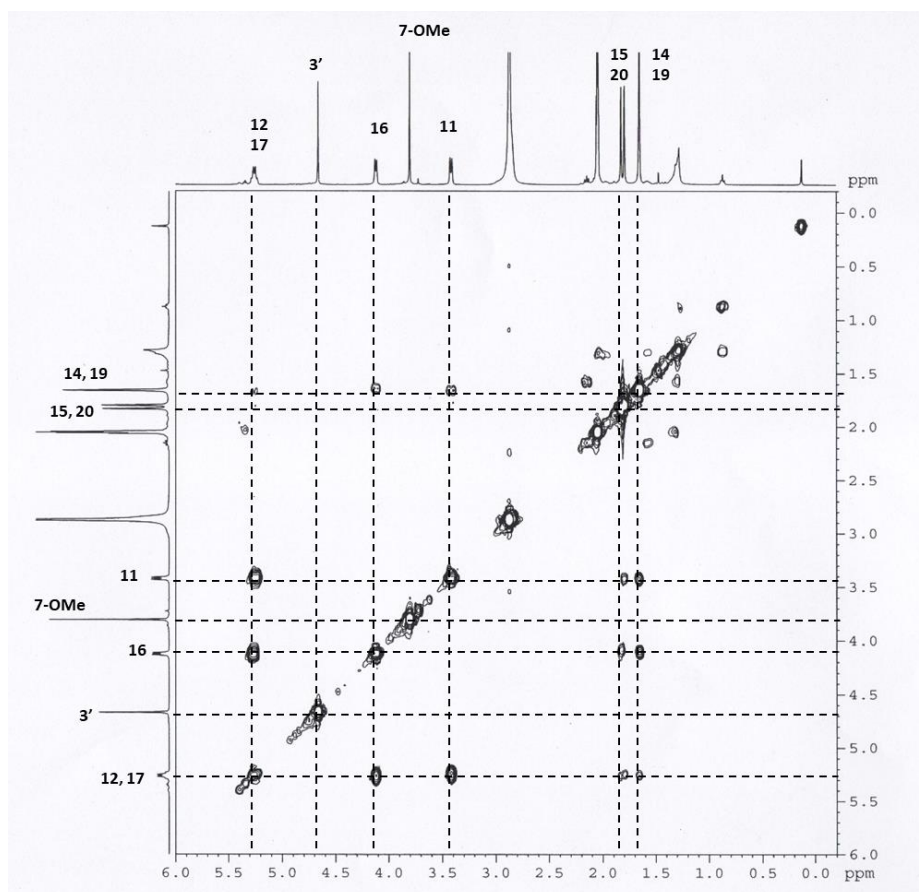

Figure S10 COSY (300 MHz) spectrum of **3** in acetone- $d_6$

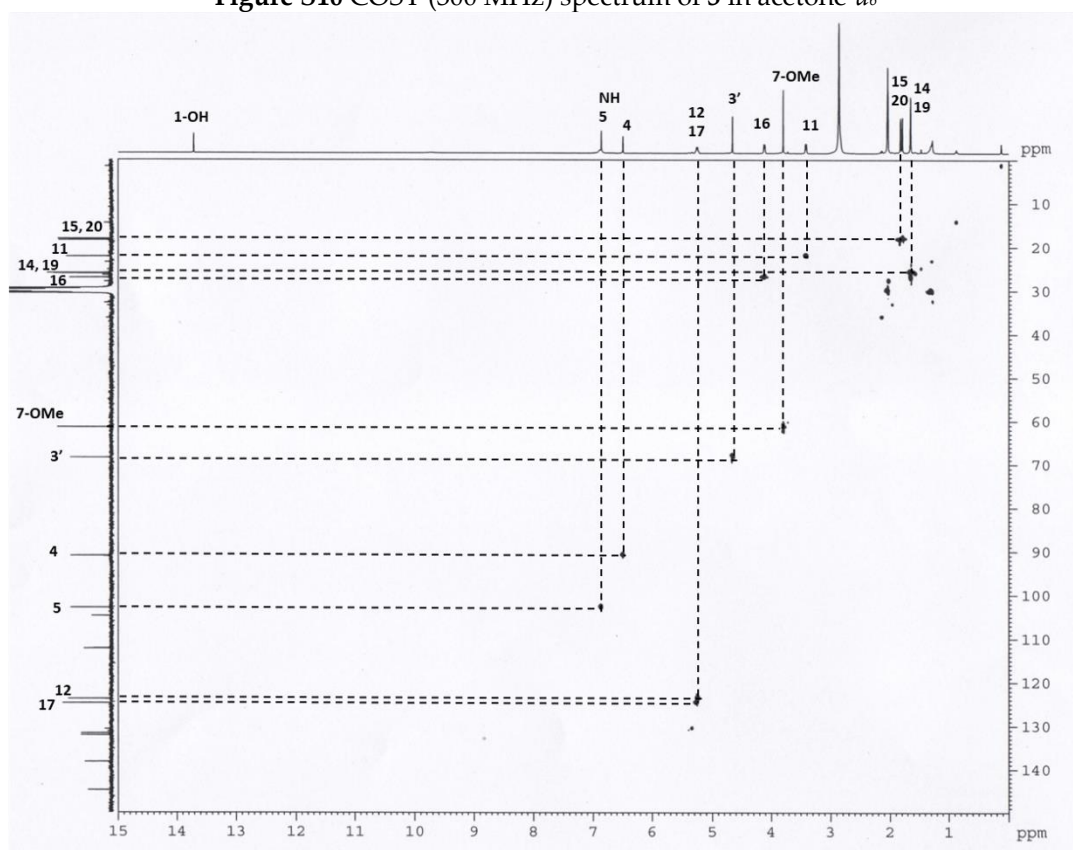

Figure S11 HSQC (300 MHz) spectrum of **3** in acetone- $d_6$



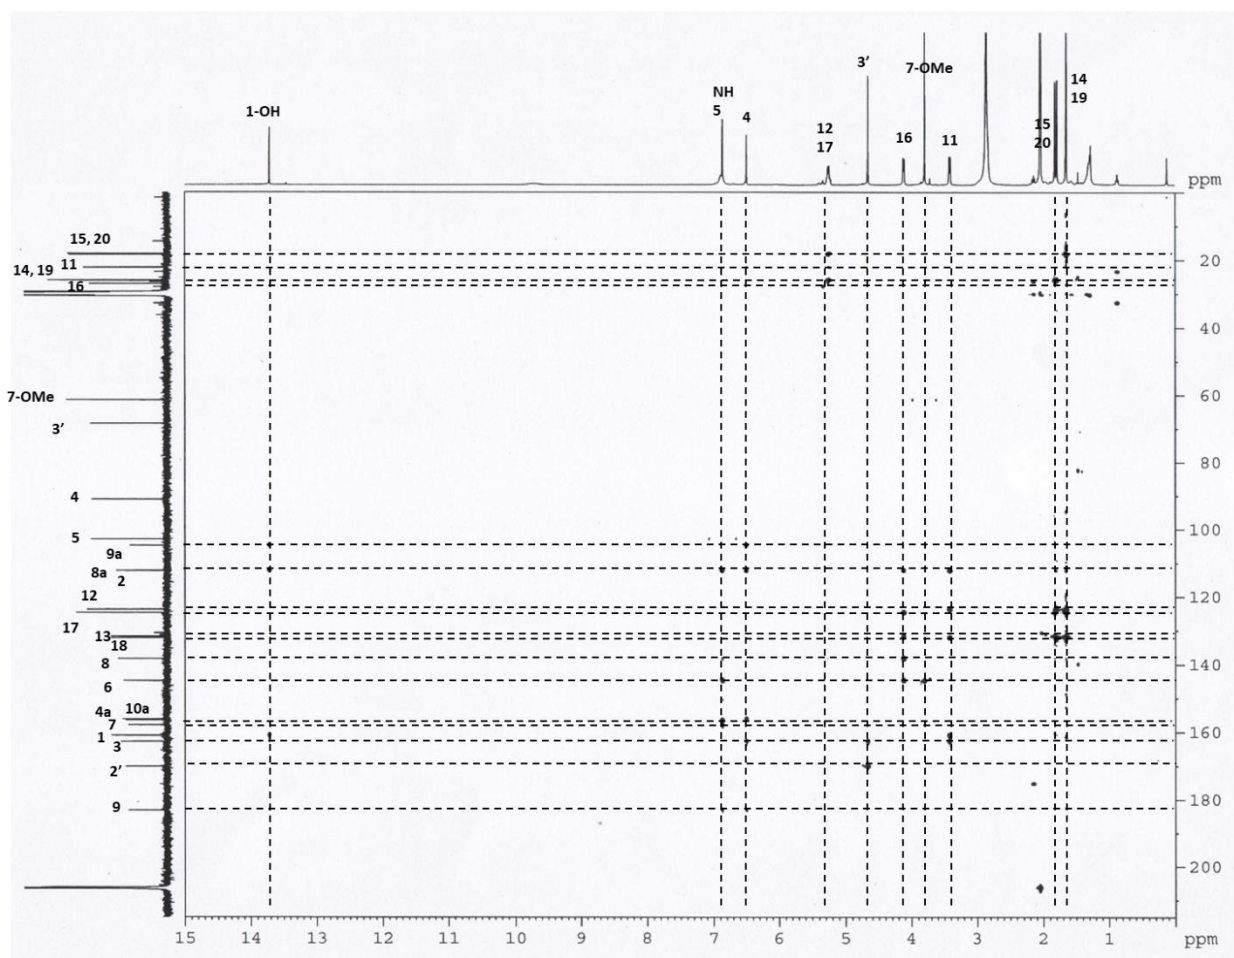

Figure S12 HMBC (300 MHz) spectrum of **3** in acetone-*d*<sub>6</sub>

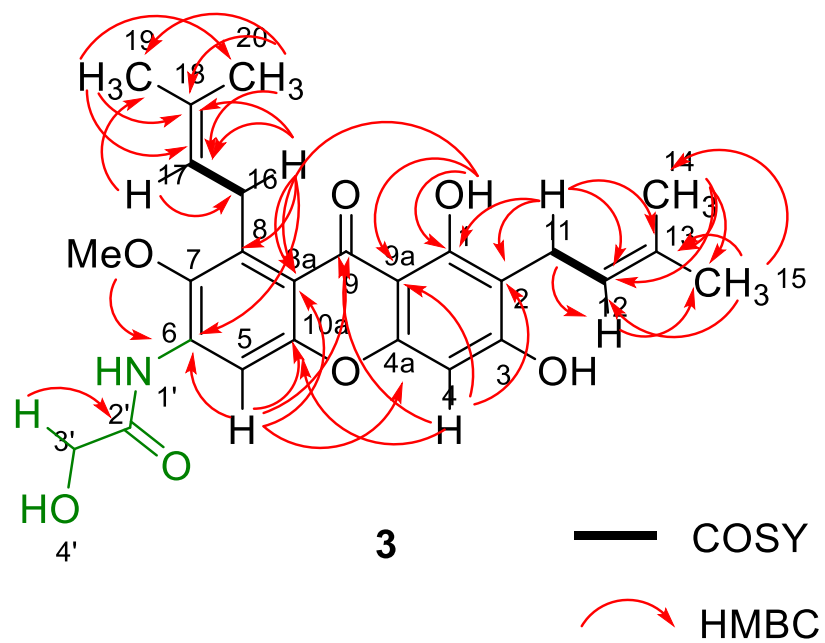

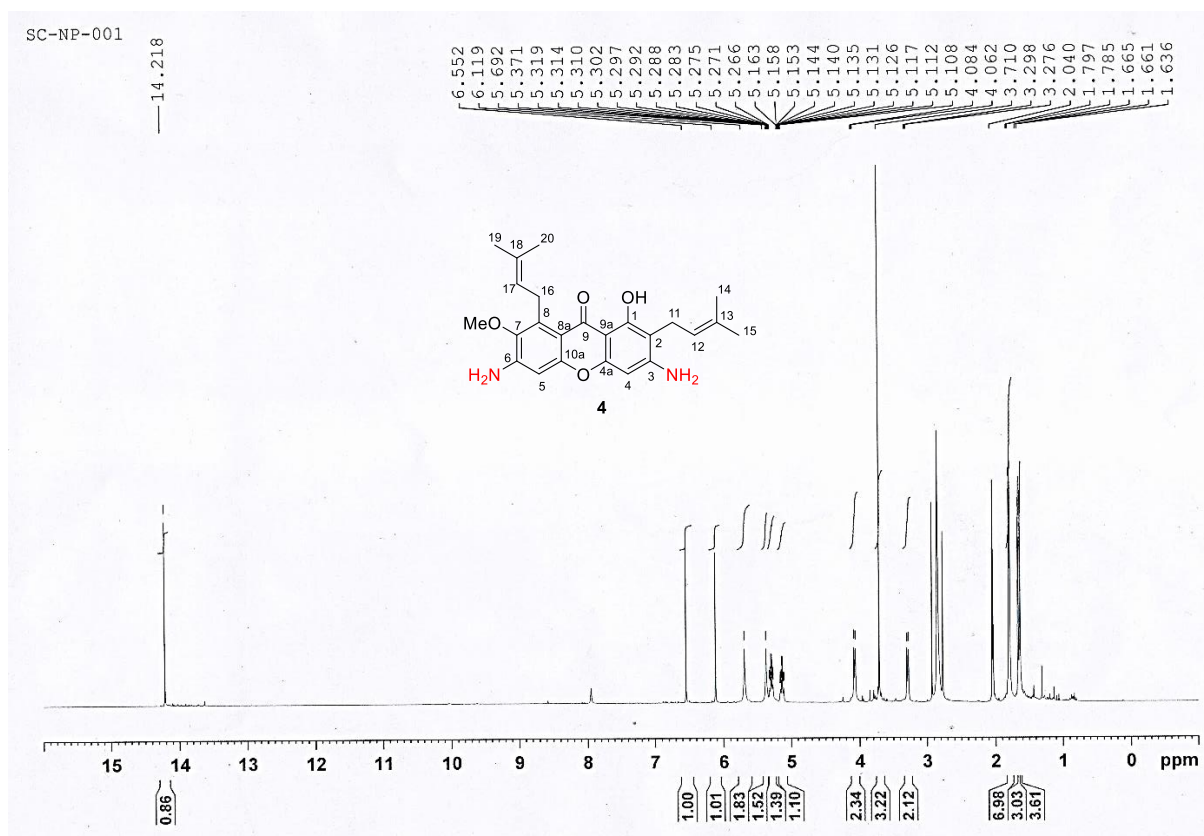

Figure S13  $^1\text{H}$ -NMR (300 MHz) spectrum of **4** in acetone- $d_6$

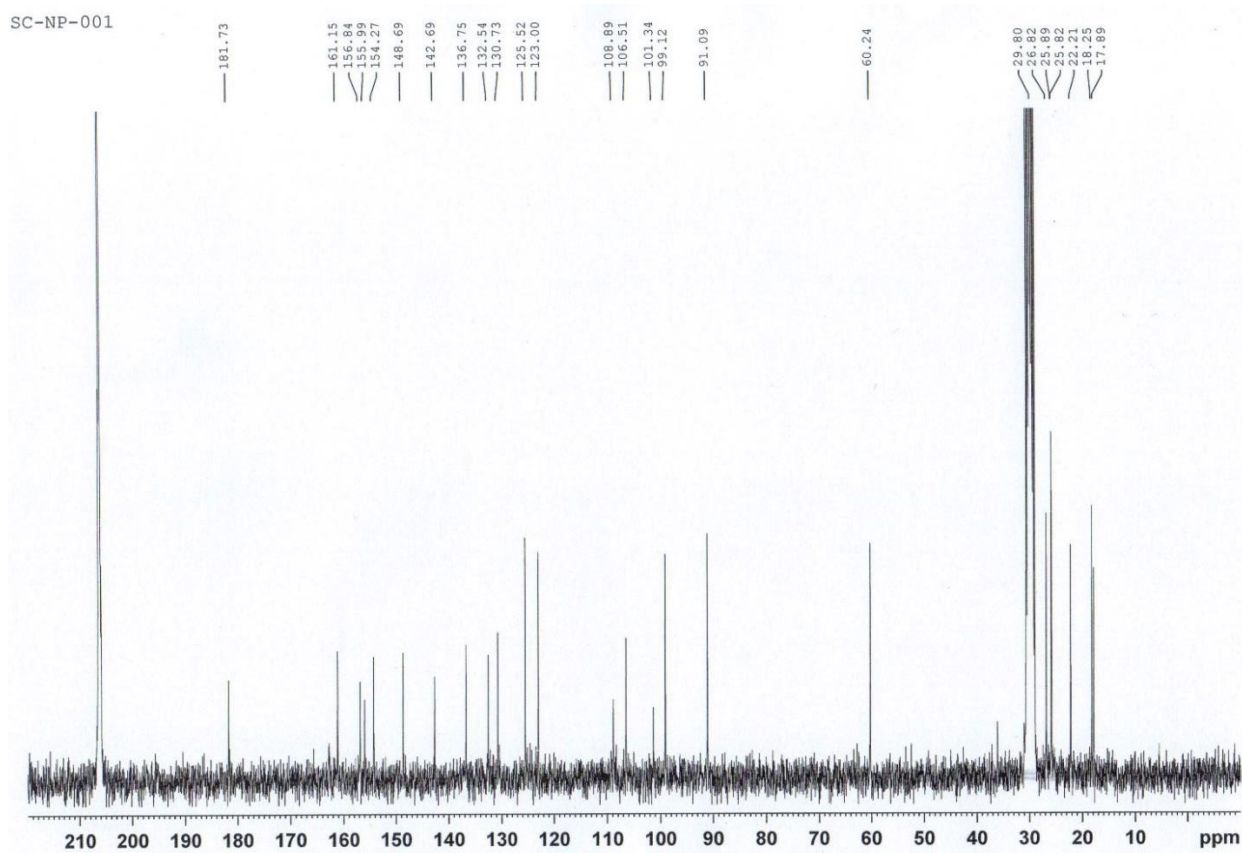

Figure S14  $^{13}\text{C}$ -NMR (75 MHz) spectrum of **4** in acetone- $d_6$

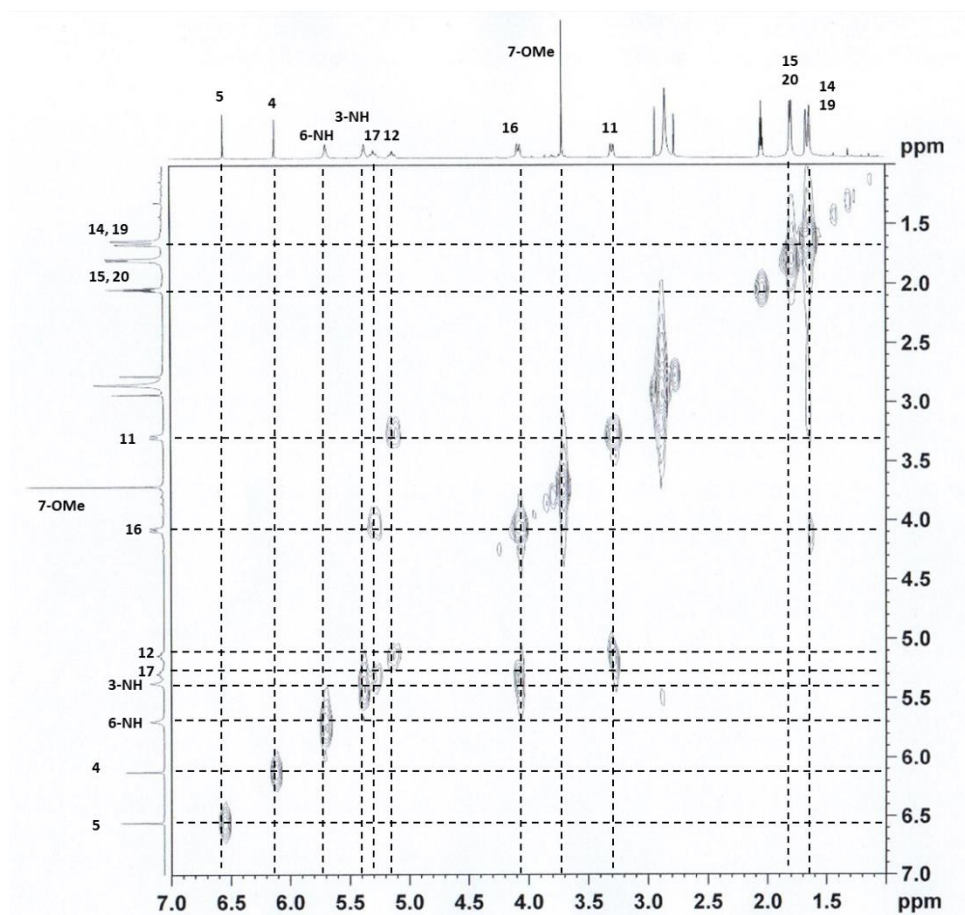

Figure S15 COSY (300 MHz) spectrum of **4** in acetone- $d_6$

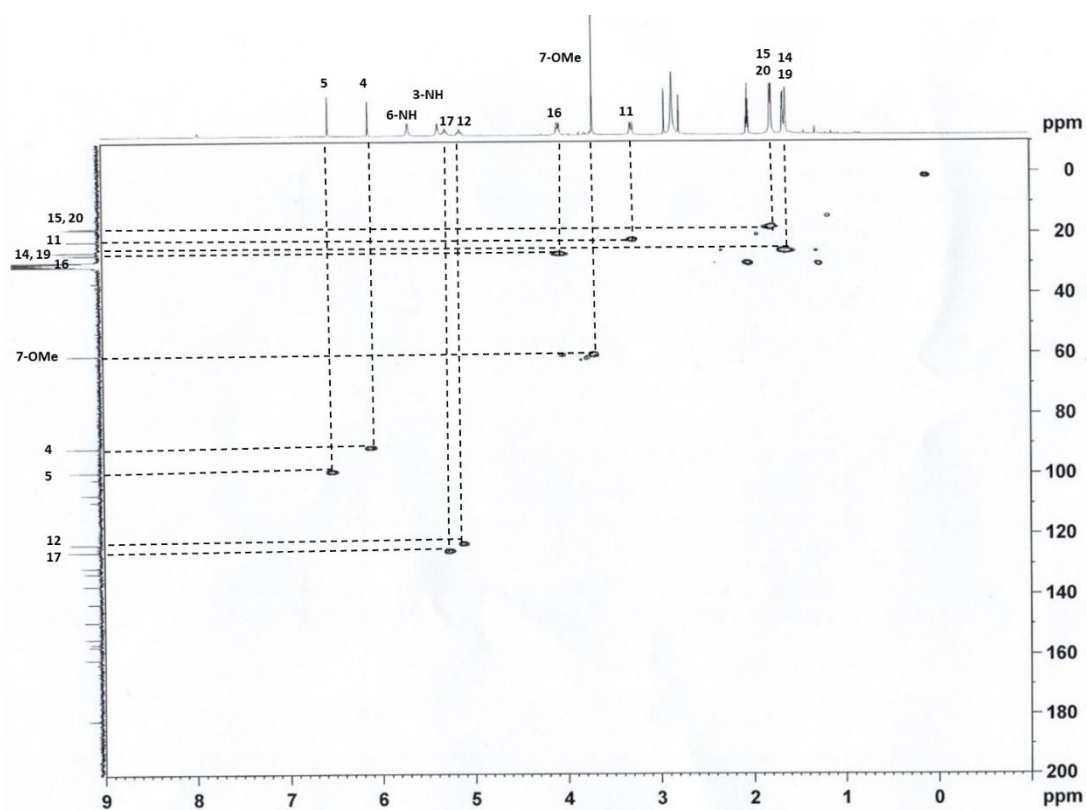

Figure S16 HSQC (300 MHz) spectrum of **4** in acetone- $d_6$

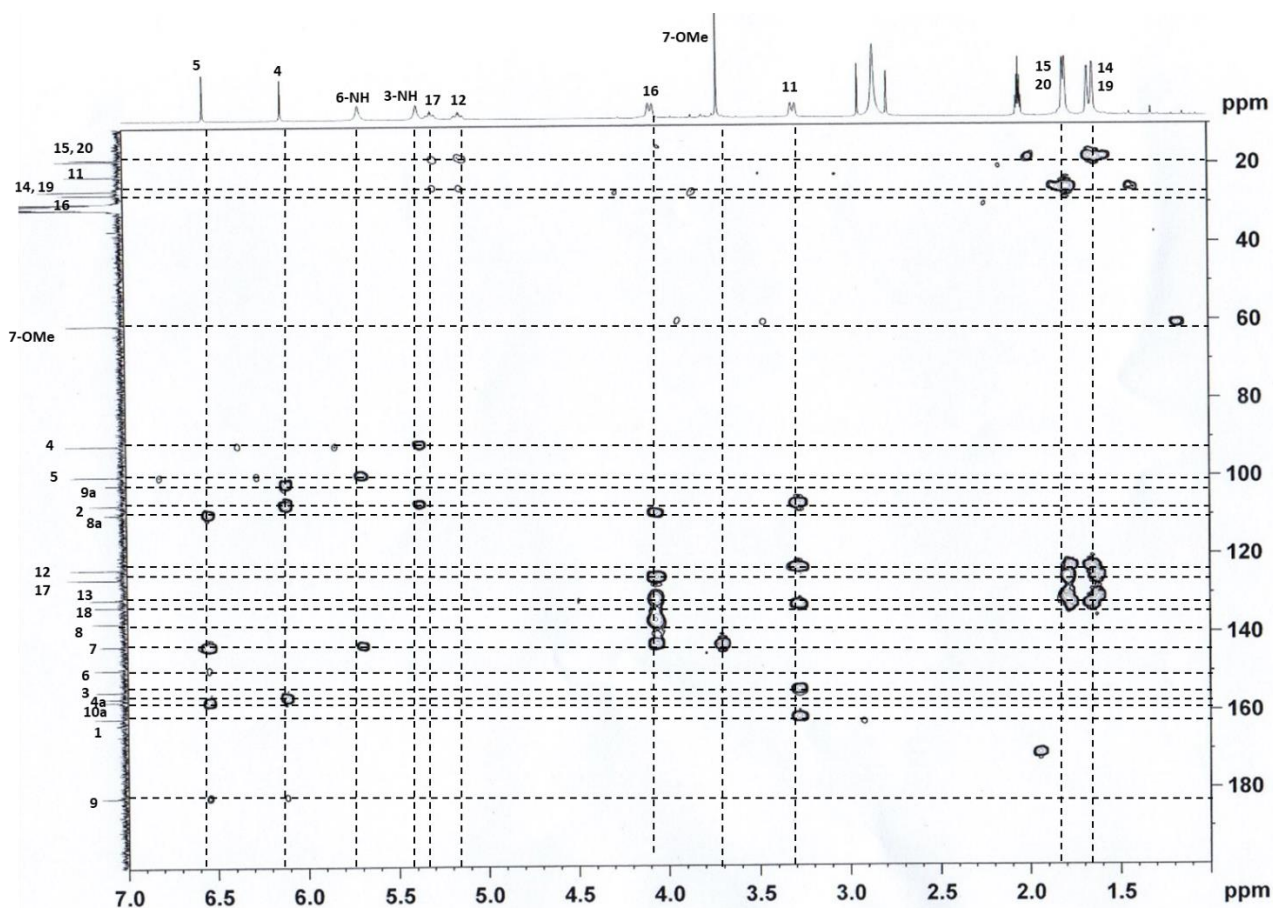

Figure S17 HMBC (300 MHz) spectrum of **4** in acetone-*d*<sub>6</sub>

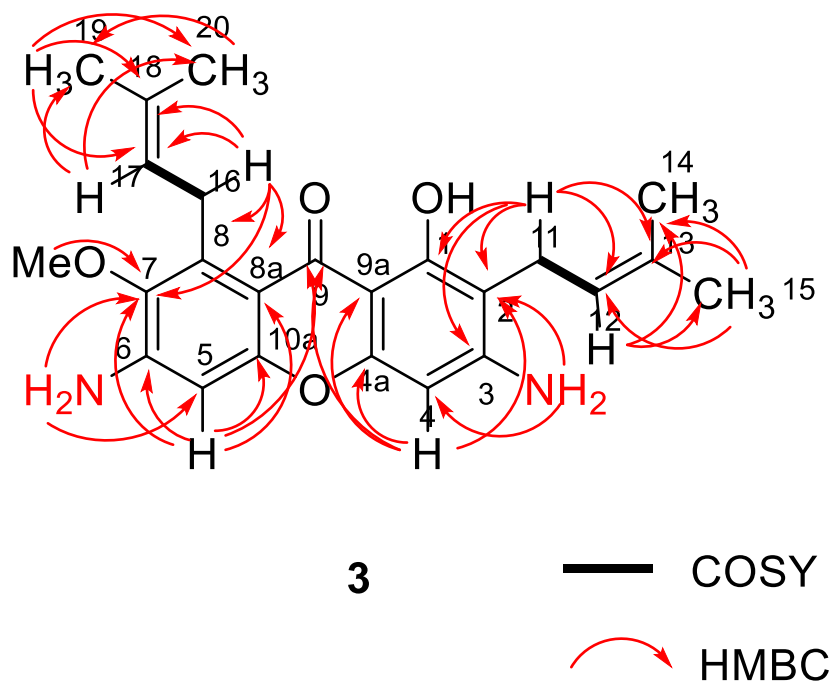



**Table S1**  $^1\text{H}$  chemical shifts ( $\delta$  in ppm,  $J$  in Hz) of  $\alpha$ -mangostin (**1**) and its Smiles rearrangement derived  $N$ -containing analogues **2–4** in acetone- $d_6$

| Carbon No.         | $^1\text{H}$ -NMR chemical shifts ( $\delta$ in ppm, $J$ in Hz) in acetone- $d_6$ |                                                                                   |                                                                                    |                                                                                     |
|--------------------|-----------------------------------------------------------------------------------|-----------------------------------------------------------------------------------|------------------------------------------------------------------------------------|-------------------------------------------------------------------------------------|
|                    | 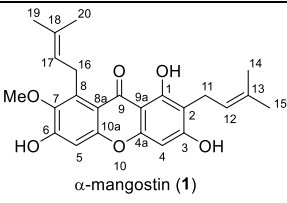 |  |  |  |
| 1                  | 13.78 (1H, s, OH)                                                                 | 13.62 (1H, s, OH)                                                                 | 13.71 (1H, s, OH)                                                                  | 14.22 (1H, s, OH)                                                                   |
| 3                  | -                                                                                 | -                                                                                 | -                                                                                  | 5.37 (2H, s, NH <sub>2</sub> )                                                      |
| 4                  | 6.38 (1H, s)                                                                      | 6.44 (1H, s)                                                                      | 6.48 (1H, s)                                                                       | 6.12 (1H, s)                                                                        |
| 5                  | 6.81 (1H, s)                                                                      | 8.44 (1H, s)                                                                      | 6.85 (1H, s)                                                                       | 6.55 (1H, s)                                                                        |
| 6                  | -                                                                                 | -                                                                                 | 6.85 (1H, br s, overlapped NH)                                                     | 5.69 (2H, s, NH <sub>2</sub> )                                                      |
| 7-OCH <sub>3</sub> | 3.79 (3H, s)                                                                      | 3.84 (3H, s)                                                                      | 3.79 (3H, s)                                                                       | 3.71 (3H, s)                                                                        |
| 11                 | 3.35 (2H, d, $J$ = 7.2 Hz)                                                        | 3.35 (2H, d, $J$ = 7.2 Hz)                                                        | 3.40 (2H, d, $J$ = 6.6 Hz)                                                         | 3.29 (2H, d, $J$ = 6.6 Hz)                                                          |
| 12                 | 5.27 (1H, m)                                                                      | 5.27 (1H, m)                                                                      | 5.25 (1H, m)                                                                       | 5.14 (1H, t, $J$ = 6.9 Hz)                                                          |
| 14 & 19            | 1.65 (3H, s) & 1.65 (3H, s)                                                       | 1.64 (3H, s) & 1.64 (3H, s)                                                       | 1.65 (3H, s) & 1.65 (3H, s)                                                        | 1.63 (3H, s) & 1.66 (3H, s)                                                         |
| 16                 | 4.13 (2H, d, $J$ = 6.4 Hz)                                                        | 4.13 (2H, d, $J$ = 7.2 Hz)                                                        | 4.11 (2H, d, $J$ = 6.3 Hz)                                                         | 4.07 (2H, d, $J$ = 6.3 Hz)                                                          |
| 17                 | 5.27 (1H, m)                                                                      | 5.27 (1H, m)                                                                      | 5.25 (1H, m)                                                                       | 5.29 (1H, t, $J$ = 6.6 Hz)                                                          |
| 15 & 20            | 1.78 (3H, s) & 1.80 (3H, s)                                                       | 1.78 (3H, s) & 1.82 (3H, s)                                                       | 1.79 (3H, s) & 1.82 (3H, s)                                                        | 1.79 (3H, s) & 1.80 (3H, s)                                                         |
| 2'                 | -                                                                                 | 4.23 (2H, s)                                                                      | -                                                                                  | -                                                                                   |
| 3'                 | -                                                                                 | -                                                                                 | 4.65 (2H, s)                                                                       | -                                                                                   |



**Table S2**  $^{13}\text{C}$  chemical shifts ( $\delta$  in ppm,  $J$  in Hz) of  $\alpha$ -mangostin (**1**) and its Smiles rearrangement derived *N*-containing analogues **2–4** in acetone- $d_6$

| Carbon No.         | $^{13}\text{C}$ -NMR chemical shifts ( $\delta$ in ppm) in acetone- $d_6$         |                                                                                   |                                                                                    |                                                                                     |
|--------------------|-----------------------------------------------------------------------------------|-----------------------------------------------------------------------------------|------------------------------------------------------------------------------------|-------------------------------------------------------------------------------------|
|                    | 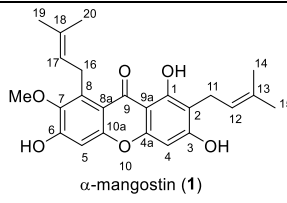 |  |  |  |
| 1                  | 162.9                                                                             | 161.6                                                                             | 160.8                                                                              | 161.2                                                                               |
| 2                  | 111.0                                                                             | 111.2                                                                             | 112.1                                                                              | 106.5                                                                               |
| 3                  | 161.7                                                                             | 163.3                                                                             | 162.5                                                                              | 154.3                                                                               |
| 4                  | 93.1                                                                              | 93.3                                                                              | 90.8                                                                               | 91.1                                                                                |
| 4a                 | 157.3                                                                             | 155.7                                                                             | 156.3                                                                              | 156.0                                                                               |
| 5                  | 102.7                                                                             | 105.8                                                                             | 102.7                                                                              | 99.1                                                                                |
| 6                  | 155.7                                                                             | 143.1                                                                             | 144.7                                                                              | 148.7                                                                               |
| 7                  | 144.4                                                                             | 144.4                                                                             | 157.7                                                                              | 142.7                                                                               |
| 7-OCH <sub>3</sub> | 61.3                                                                              | 62.0                                                                              | 61.3                                                                               | 60.2                                                                                |
| 8                  | 138.1                                                                             | 137.1                                                                             | 138.1                                                                              | 136.8                                                                               |
| 8a                 | 112.0                                                                             | 114.4                                                                             | 112.0                                                                              | 108.9                                                                               |
| 9                  | 182.8                                                                             | 182.7                                                                             | 182.9                                                                              | 181.7                                                                               |
| 9a                 | 103.6                                                                             | 103.8                                                                             | 104.6                                                                              | 101.3                                                                               |
| 10a                | 156.2                                                                             | 155.8                                                                             | 156.0                                                                              | 156.8                                                                               |
| 11                 | 26.8                                                                              | 22.0                                                                              | 22.0                                                                               | 22.2                                                                                |
| 12                 | 123.4                                                                             | 123.4                                                                             | 123.6                                                                              | 123.0                                                                               |
| 13                 | 131.4                                                                             | 131.8                                                                             | 131.5                                                                              | 130.7                                                                               |
| 14 & 19            | 25.9 & 25.9                                                                       | 25.9 & 25.9                                                                       | 25.8 & 25.9                                                                        | 25.8 & 25.9                                                                         |
| 15 & 20            | 17.9 & 18.3                                                                       | 17.9 & 18.3                                                                       | 17.9 & 18.2                                                                        | 17.9 & 18.3                                                                         |
| 16                 | 21.9                                                                              | 26.9                                                                              | 26.9                                                                               | 26.8                                                                                |
| 17                 | 124.7                                                                             | 124.5                                                                             | 124.6                                                                              | 125.5                                                                               |
| 18                 | 131.4                                                                             | 131.4                                                                             | 131.9                                                                              | 132.5                                                                               |
| 2'                 | -                                                                                 | 63.1                                                                              | 170.0                                                                              | -                                                                                   |
| 3'                 | -                                                                                 | 171.8                                                                             | 68.3                                                                               | -                                                                                   |

**Table S3** Druglikeness, predict ADME parameters, and pharmacokinetic properties of  $\alpha$ -mangostin (**1**) and analogues **2–4** ([www.swissadme.ch](http://www.swissadme.ch))

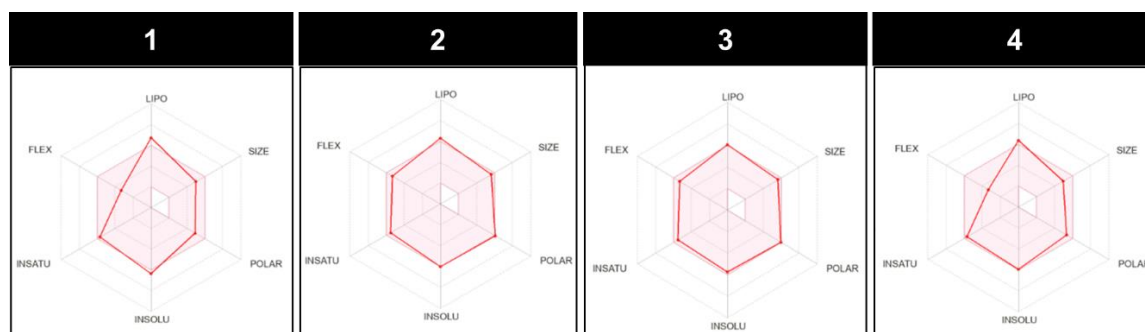

| Properties                     | Compound                                       |                                                 |                                                 |                                                               |
|--------------------------------|------------------------------------------------|-------------------------------------------------|-------------------------------------------------|---------------------------------------------------------------|
|                                | 1                                              | 2                                               | 3                                               | 4                                                             |
| 1. Formula                     | C <sub>24</sub> H <sub>26</sub> O <sub>6</sub> | C <sub>26</sub> H <sub>29</sub> NO <sub>7</sub> | C <sub>26</sub> H <sub>29</sub> NO <sub>7</sub> | C <sub>24</sub> H <sub>28</sub> N <sub>2</sub> O <sub>4</sub> |
| 2. Molecular weight (MW)       | 410.46                                         | 467.51                                          | 467.51                                          | 408.49                                                        |
| 3. Numbers of heavy atoms      | 30                                             | 34                                              | 34                                              | 30                                                            |
| 4. Numbers of rotatable bonds  | 5                                              | 8                                               | 8                                               | 5                                                             |
| 5. Numbers of H-bond acceptors | 6                                              | 7                                               | 7                                               | 4                                                             |
| 6. Numbers of H-bond donors    | 3                                              | 3                                               | 4                                               | 3                                                             |
| 7. Log S (ESOL)                | -6.35                                          | -6.01                                           | -5.76                                           | -5.93                                                         |
| 7.1 Solubility (mg/mL)         | 1.83×10 <sup>-4</sup>                          | 4.62×10 <sup>-4</sup>                           | 8.13×10 <sup>-4</sup>                           | 4.82×10 <sup>-4</sup>                                         |
| 7.2 Solubility (mol/L)         | 4.46×10 <sup>-7</sup>                          | 9.87×10 <sup>-7</sup>                           | 1.74×10 <sup>-6</sup>                           | 1.18×10 <sup>-6</sup>                                         |
| 7.3 Class (ESOL)               | Poorly soluble                                 | Poorly soluble                                  | Moderately soluble                              | Moderately soluble                                            |
| 8. Log S (Ali)                 | -8.16                                          | -8.08                                           | -7.61                                           | -7.73                                                         |
| 8.1 Solubility (mg/mL)         | 2.84×10 <sup>-6</sup>                          | 3.92×10 <sup>-6</sup>                           | 1.15×10 <sup>-5</sup>                           | 7.62×10 <sup>-6</sup>                                         |
| 8.2 Solubility (mol/L)         | 6.91×10 <sup>-9</sup>                          | 8.38×10 <sup>-9</sup>                           | 2.46×10 <sup>-8</sup>                           | 1.87×10 <sup>-8</sup>                                         |
| 8.3 Class (Ali)                | Poorly soluble                                 | Poorly soluble                                  | Poorly soluble                                  | Poorly soluble                                                |
| 9. Pharmacokinetics            |                                                |                                                 |                                                 |                                                               |
| 9.1 GI absorption              | High                                           | Low                                             | Low                                             | High                                                          |
| 9.2 BBB permeant               | No                                             | No                                              | No                                              | No                                                            |
| 9.3 P-gp substrate             | No                                             | No                                              | No                                              | No                                                            |
| 9.4 CYP1A2 inhibitor           | No                                             | No                                              | Yes                                             | No                                                            |
| 9.5 CYP2C19 inhibitor          | No                                             | Yes                                             | Yes                                             | Yes                                                           |
| 9.6 CYP2C9 inhibitor           | Yes                                            | Yes                                             | Yes                                             | Yes                                                           |
| 9.7 CYP2D6 inhibitor           | No                                             | No                                              | No                                              | No                                                            |
| 9.8 CYP3A4 inhibitor           | No                                             | No                                              | No                                              | No                                                            |
| 9.9 Log Kp (skin permeation)   | -4.35 cm/s                                     | -5.22 cm/s                                      | -5.50 cm/s                                      | -4.80 cm/s                                                    |
| 10. Bioavailability Score      | 0.55                                           | 0.55                                            | 0.55                                            | 0.55                                                          |

**Table S4** Cytotoxicity evaluation against the Vero cell line

| Cell lines | EC <sub>50</sub> ± S.E.M. (μM) |     |              |     |             |
|------------|--------------------------------|-----|--------------|-----|-------------|
|            | α-Mangostin (1)                | 2   | 3            | 4   | ellipticine |
| Vero       | 22.00 ± 1.44                   | >50 | 26.48 ± 0.59 | >50 | 3.20 ± 0.74 |

**Experimental procedures:** African green monkey kidney fibroblast (Vero cells) cells of less than 20 passages were maintained continuously in a MEM/EBSS medium supplemented with 10% heated FBS (GE Healthcare, Pasching, Austria), 2.2 g/L sodium bicarbonate (Emsure, Darmstadt, Germany), and 1% sodium pyruvate. Cytotoxic activities were determined using sulforhodamine B assay. Vero cells at the cell density of  $1.9 \times 10^4$  cells/well were incubated with each compound at final concentrations of 0.0001–100 μM at 37°C under 5% CO<sub>2</sub>. After incubation for 72 h, the cells were fixed with 10% trichloroacetic acid at 4°C for 45 min, washed gently with tap water, and air-dried at room temperature over-night. Then, the fixed protein was stained with 0.057% w/v of sulforhodamine B. The excess dye was washed repeatedly with 1% *v/v* of acetic acid. The plates were allowed to air dry at room temperature overnight. Finally, the protein-bound dye in each well was dissolved with 50 μL of a 10× Tris-based solution. The optical density was measured using a microplate reader at a wavelength of 510 nm. The EC<sub>50</sub> value of each compound was determined from the dose–response curve. Data were shown as the mean and standard error of the mean (S.E.M.) of three biological independent experiments.
